# Supplementary material for: Comparison of Single Cell Transcriptome Sequencing Methods: Of Mice and Men
Source: Genes (Basel). 2023 Dec 16;14(12):2226. doi: 10.3390/genes14122226 (PMC10743076; doi:10.3390/genes14122226)
Supplement: Supplementary file 1 [file genes-14-02226-s001.zip]

Archive with 4 entries (4 files):
- Supplementary methods and results.pdf
- Table S1 Datasets overview and characteristics.xlsx
- Table S2 mtRNA, features and diversity metrics.xlsx
- Table S3 Exon coverage.xls
