# Supplementary material for: Comparison of Single Cell Transcriptome Sequencing Methods: Of Mice and Men
Source: Genes (Basel). 2023 Dec 16;14(12):2226. doi: 10.3390/genes14122226 (PMC10743076; doi:10.3390/genes14122226)
Supplement: Supplementary file 1 [file genes-14-02226-s001.zip › Table S1 Datasets overview and characteristics.xlsx]

## Sheet: Sheet1
Dataset	Species	PE/SR	Read length R1+R2	Sequencer	Input cells	Expected return	Actual return	Actual return percentage	Identified human cells	Identified mouse cells	Identified multiplets	Percentage multiplets	Actual return normalized cells	Percentage	Normalized identified human cells	Normalized identified mouse cells	Normalized multiplets	Percentage normalized multiplets	Barcoding efficiency	Note
TruSeq stranded mRNA	human	PE	51+51	Nextseq2000	N/A	N/A	N/A	N/A	N/A	N/A	N/A	N/A	N/A	N/A	N/A	N/A	N/A	N/A	N/A
TruSeq stranded mRNA	mouse	PE	51+51	Nextseq2000	N/A	N/A	N/A	N/A	N/A	N/A	N/A	N/A	N/A	N/A	N/A	N/A	N/A	N/A	N/A
10X	human+mouse	PE	28+90	HiSeq2500+Nextseq2000	8250	5000	2560	51.2	1568	936	56	2.1875	2558	51.16	1568	934	56	2.18921	0.858191
HIVE	human	PE	26+51	Nextseq550	15000	6000	454	7.56667	454	0	0	0	455	7.58333	455	0	0	0	0.653887	All HIVEs were prepared and processed on the same date.
HIVE	mouse	PE	26+51	Nextseq550	15000	6000	658	10.9667	0	658	0	0	654	10.9	0	654	0	0	0.584004	All HIVEs were prepared and processed on the same date.
HIVE	human+mouse	PE	26+51	Nextseq550	15000	6000	610	10.1667	290	261	59	9.67213	605	10.0833	291	262	52	8.59504	0.548225	All HIVEs were prepared and processed on the same date.
HIVE, frozen	human+mouse	PE	26+51	Nextseq550	15000	6000	344	5.73333	132	183	29	8.43023	344	5.73333	132	184	28	8.13953	0.597745	This HIVE was frozen for approximately 6 months. Initial processding was on the same day as the other HIVEs. Processing after freezing was on the same day as the frozen HIVE CLX
HIVE CLX	human	PE	26+51	Nextseq550	30000	11000	5741	52.1909	5741	0	0	0	5754	52.3091	5754	0	0	0	0.634156	All HIVE CLX were prepared and processed on the same date.
HIVE CLX	mouse	PE	26+51	Nextseq550	30000	11000	8207	74.6091	0	8207	0	0	8185	74.4091	0	8185	0	0	0.583506	All HIVE CLX were prepared and processed on the same date.
HIVE CLX	human+mouse	PE	26+51	Nextseq550	30000	11000	5821	52.9182	3035	2211	575	9.87803	5802	52.7455	3026	2204	572	9.85867	0.583576	All HIVE CLX were prepared and processed on the same date.
HIVE CLX, frozen	human+mouse	PE	26+51	Nextseq550	30000	11000	5562	50.5636	3118	1986	458	8.23445	5544	50.4	3116	1971	457	8.24315	0.598082	This HIVE CLX was frozen for approximately 6 weeks. Initial processding was on the same day as the other HIVE CLX. Processing after freezing was on the same day as the frozen HIVE.
Evercode WT mini	human	PE	100+100	Nextseq2000	1666	1666	1006	60.3842	1006	0	0	0	1009	60.5642	1009	0	0	0	0.584312	All Evercode samples were prepared on the same day.
Evercode WT mini	human	PE	100+100	Nextseq2000	1666	1666	1004	60.2641	1004	0	0	0	1004	60.2641	1004	0	0	0	0.59504	All Evercode samples were prepared on the same day.
Evercode WT mini	mouse	PE	100+100	Nextseq2000	1666	1666	644	38.6555	0	641	3	0.465839	N/A	N/A	N/A	N/A	N/A	N/A	0.388184	All Evercode samples were prepared on the same day. Not enough data was generated to downsample the mESC data.
Evercode WT mini	mouse	PE	100+100	Nextseq2000	1666	1666	568	34.0936	0	567	1	0.176056	N/A	N/A	N/A	N/A	N/A	N/A	0.374698	All Evercode samples were prepared on the same day. Not enough data was generated to downsample the mESC data.
Evercode WT mini	human+mouse	PE	100+100	Nextseq2000	1666	1666	604	36.2545	271	32	301	49.8344	607	36.4346	272	32	303	49.9176	0.506403	All Evercode samples were prepared on the same day.
Evercode WT mini	human+mouse	PE	100+100	Nextseq2000	1666	1666	612	36.7347	279	34	299	48.8562	618	37.0948	285	32	301	48.7055	0.50998	All Evercode samples were prepared on the same day.
SORT-seq	human+mouse	PE	26+60	Nextseq500	376	376	174	46.2766	104	64	6	3.44828	174	46.2766	104	65	5	2.87356	0.900888	All 3 SORT-seq plates were prepared and processed on the same date
SORT-seq	human+mouse	PE	26+60	Nextseq500	376	376	186	49.4681	114	64	7	3.76344	184	48.9362	113	64	7	3.80435	0.892284	All 3 SORT-seq plates were prepared and processed on the same date
SORT-seq	human+mouse	PE	26+60	Nextseq500	376	376	241	64.0957	133	98	10	4.14938	240	63.8298	134	97	9	3.75	0.926102	All 3 SORT-seq plates were prepared and processed on the same date
VASA-seq	human+mouse	PE	26+60	Nextseq500	376	376	235	62.5	127	99	9	3.82979	234	62.234	126	100	8	3.4188	0.929039	All 3 VASA-seq plates were prepared and processed on the same date
VASA-seq	human+mouse	PE	26+60	Nextseq500	376	376	257	68.3511	131	106	20	7.7821	259	68.883	131	108	20	7.72201	0.920393	All 3 VASA-seq plates were prepared and processed on the same date
VASA-seq	human+mouse	PE	26+60	Nextseq500	376	376	184	48.9362	98	78	8	4.34783	182	48.4043	94	79	9	4.94505	0.921208	All 3 VASA-seq plates were prepared and processed on the same date
Plexwell	human+mouse	PE	51+51	Nextseq2000	96	96	96	100	59	37	0	0	96	100	59	37	0	0	N/A
Plexwell	human+mouse	SR	51	HiSeq2500	96	96	93	96.875	46	47	0	0	92	95.8333	46	46	0	0	N/A
FLASH-seq	human+mouse	PE	51+51	Nextseq2000	60	60	49	81.6667	26	23	0	0	49	81.6667	26	23	0	0	N/A
FLASH-seq	human+mouse	PE	51+51	Nextseq2000	382	382	186	48.6911	95	91	0	0	185	48.4293	95	90	0	0	N/A
FLASH-seq	human+mouse	PE	51+51	Nextseq2000	382	382	369	96.5969	185	184	0	0	369	96.5969	185	184	0	0	N/A
FLASH-seq	human	PE	51+51	Nextseq2000	88	88	88	100	88	0	0	0	88	100	88	0	0	0	N/A
Smart-seq3	human+mouse	PE	51+51	Nextseq2000	384	384	361-365	94.5312	186-187	174-179	0	0	360-366	94.5312	186-187	174-179	1	0.274725	N/A	Differences in return are numbers derived from UMI and body reads
Smart-seq3	human+mouse	PE	51+51	Nextseq2000	328	328	304-314	93.5976	152-160	152-154	0	0	304-311	93.75	152-158	152-153	0	0	N/A	Differences in return are numbers derived from UMI and body reads
Smart-seq3	human+mouse	SR	51	HiSeq2500	384	384	362-366	94.7917	186-187	175-180	0	0	361-366	94.6615	186-187	175-179	0	0	N/A	Technical replicate of one of the PE datasets; Differences in return are numbers derived from UMI and body reads
