# Supplementary material for: Comparison of Single Cell Transcriptome Sequencing Methods: Of Mice and Men
Source: Genes (Basel). 2023 Dec 16;14(12):2226. doi: 10.3390/genes14122226 (PMC10743076; doi:10.3390/genes14122226)
Supplement: Supplementary file 1 [file genes-14-02226-s001.zip › Table S2 mtRNA, features and diversity metrics.xlsx]

## Sheet: Sheet1
mtRNA
Method	Total human cells	Min mtRNA human	Max mtRNA human	average mtRNA human	human cells below 10% mtRNA	Percentage human cells below 10% mtRNA	Total mouse cells	Min mtRNA mouse	Max mtRNA mouse	average mtRNA mouse	mouse cells below 5% mtRNA	percentage mouse cells below 5% mtRNA
TrueSeq standed mRNA	3	1.76689	1.86905	1.81297	3	1	3	2.20547	2.27503	2.24006	3	1
10X Next GEM 3'	1567	0.0239866	87.1586	9.65434	893	0.569879	930	0.0158253	14.2552	3.05949	894	0.96129
HIVE	746	0.0654022	35.0267	4.7021	732	0.981233	916	0.0362319	23.0371	3.99234	733	0.800218
HIVE, frozen	132	0.148395	31.1642	4.61227	127	0.962121	184	1.23093	7.46829	3.51695	167	0.907609
HIVE CLX	8780	0.0175131	23.6665	2.54222	8771	0.998975	10387	0.0139218	12.2014	1.28822	10346	0.996053
HIVE CLX, frozen	3116	0.0334588	17.7842	2.71927	3114	0.999358	1970	0.0180115	7.77385	1.32138	1968	0.998985
Evercode WT Mini	2570	0.295508	5.73105	2.36618	2570	1	1272	0.0653168	2.45347	0.722663	1272	1
SORT-seq	351	2.63022	43.6987	12.7252	146	0.415954	226	5.01906	27.2804	11.5981	0	0
VASA-seq	351	0.680693	11.6848	3.74745	349	0.994302	286	0.134318	6.45376	1.41473	284	0.993007
Plexwell	105	0.995223	24.9427	4.39342	104	0.990476	83	0.233801	24.8337	4.27773	69	0.831325
FLASH-seq	394	0.394477	64.9445	6.36278	381	0.967005	297	0.00703185	14.9846	2.45112	292	0.983165
Smart-seq3 UMI	532	0.777907	57.57	7.74851	483	0.907895	502	0.409476	17.3293	3.59408	442	0.880478
Smart-seq3 body	524	1.5898	82.4834	13.9331	51	0.0973282	510	0.159458	32.0927	4.23085	403	0.790196
Features
Method	min features human	max features human	average features human	min features mouse	max features mouse	average features mouse
TrueSeq standed mRNA	18233	18350	18284.7	17240	17331	17297
10X Next GEM 3'	154	5706	3549.29	1018	4041	2176.77
HIVE	988	7281	3617.96	864	7236	2538.68
HIVE, frozen	1189	6685	3877.14	1181	5756	2260.91
HIVE CLX	1699	8380	3858.37	1591	8102	3431.61
HIVE CLX, frozen	1794	8003	3970.44	2051	6383	3204.22
Evercode WT Mini	826	8400	2565.2	588	8400	1719.73
SORT-seq	420	5348	2560.01	518	3891	1768.75
VASA-seq	660	5547	2968.56	630	5323	2470.7
Plexwell	679	5428	3704.86	564	5262	3545.95
FLASH-seq	227	7444	3643.86	521	6901	3713.63
Smart-seq3 UMI	684	4685	2462.64	609	4162	1604.32
Smart-seq3 body	265	5645	3044.43	630	4573	2349.75
Diversity
Method	min diversity human	max diversity human	average diversity human	min diversity mouse	max diversity mouse	average diversity mouse
TrueSeq standed mRNA	8.48196	8.52375	8.50669	8.46271	8.46668	8.46448
10X Next GEM 3'	2.56701	7.52394	7.04039	6.19843	7.46085	6.9616
HIVE	5.41776	7.99521	7.36119	5.60458	7.7769	7.073
HIVE, frozen	5.71769	7.95413	7.42157	6.53505	7.69875	7.09019
HIVE CLX	5.99214	7.97658	7.46284	6.53223	7.88294	7.38665
HIVE CLX, frozen	6.47591	7.96021	7.48393	6.96298	7.81845	7.36329
Evercode WT Mini	4.07546	8.27917	7.27829	6.09642	8.20346	7.03302
SORT-seq	4.88821	7.92947	6.97014	5.58579	7.55148	6.75294
VASA-seq	6.13535	8.02387	7.38006	6.07496	8.05367	7.30034
Plexwell	5.57466	7.83962	7.381	5.87401	7.89296	7.3409
FLASH-seq	3.88483	7.82636	7.26118	5.09813	7.76526	7.29045
Smart-seq3 UMI	4.16407	7.50959	6.79271	5.91011	7.35034	6.63606
Smart-seq3 body	2.46253	7.43643	6.75928	4.93135	7.62728	7.00218
