# Supplementary material for: Comparison of Single Cell Transcriptome Sequencing Methods: Of Mice and Men
Source: Genes (Basel). 2023 Dec 16;14(12):2226. doi: 10.3390/genes14122226 (PMC10743076; doi:10.3390/genes14122226)
Supplement: Supplementary file 1 [file genes-14-02226-s001.zip › Table S3 Exon coverage.xls]

## Sheet: Sheet1
Dataset	Average standard deviation	Number covered exons
TruSeq stranded mRNA	14.8065	37456
TruSeq stranded mRNA	16.8115	47802
10X	20.0194	68352
HIVE	23.1782	53934
HIVE	19.2758	45218
HIVE	20.909	77147
HIVE, frozen	21.0209	70821
HIVE CLX	22.6532	64775
HIVE CLX	19.0603	47283
HIVE CLX	20.3958	80745
HIVE CLX, frozen	20.3957	80746
Evercode WT mini	18.0739	50897
Evercode WT mini	17.7845	54572
Evercode WT mini	19.2235	53209
Evercode WT mini	18.8407	56957
Evercode WT mini	18.1618	56419
Evercode WT mini	17.7213	60195
SORT-seq	24.9331	41241
SORT-seq	24.6963	43650
SORT-seq	24.5251	46485
VASA-seq	19.2045	58738
VASA-seq	19.3912	58476
VASA-seq	18.7294	60395
Plexwell	15.6673	62370
Plexwell	16.5686	55018
FLASH-seq	15.7725	53115
FLASH-seq	14.7592	30200
FLASH-seq	14.6907	62768
FLASH-seq	14.6555	60905
Smart-seq3 body, dataset 1 SR	17.5236	56770
Smart-seq3 umi, dataset 1 SR	24.2805	41419
Smart-seq3 body, dataset 1 PE	16.2595	64894
Smart-seq3 umi, dataset 1 PE	24.0213	52538
Smart-seq3 body, dataset 2 PE	17.8481	52773
Smart-seq3 umi, dataset21 PE	24.0766	51640
